# Supplementary material for: Immunosenescence in persons with spinal cord injury in relation to urinary tract infections -a cross-sectional study-
Source: Springer Nature journal article supplement (doi:10.1186/s12979-017-0103-6), 2017-11-15
Supplement: MOESM1 [file 15227144]

**Table S1:** Impact of SCI duration

|                       |                                               | Recent ( $\leq 13.8y$ )<br>(IQR) | Long-term ( $>13.8y$ )<br>(IQR) | p-value          |
|-----------------------|-----------------------------------------------|----------------------------------|---------------------------------|------------------|
| Demographics          | N                                             | 43                               | 42                              | N/A              |
|                       | Age mean $\pm$ SD                             | 54.2 $\pm$ 16                    | 57.0 $\pm$ 11                   | 0.57             |
|                       | Time (y) with SCI mean $\pm$ SD               | 6.7 $\pm$ 4                      | 31.1 $\pm$ 13                   | <b>&lt;0.001</b> |
|                       | Age at SCI incident mean $\pm$ SD             | 47.3 $\pm$ 17                    | 25.8 $\pm$ 13                   | <b>&lt;0.001</b> |
|                       | Para- / Tetraplegic ratio                     | 2.1                              | 1.3                             | N/A              |
|                       | UTI (%)                                       | 42                               | 36                              | N/A              |
|                       | CMV+ (%)                                      | 72                               | 78                              | N/A              |
| Serum                 | Total prot. (mg/ml)                           | 68 (8.0)                         | 67 (6.5)                        | 0.40             |
|                       | CRP mean $\pm$ SD (mg/ml)                     | 7.3 $\pm$ 13.0                   | 4.9 $\pm$ 7.3                   | 0.88             |
| Plasma                | IgG (mg/ml)                                   | 10.1 (3.8)                       | 9.3 (2.2)                       | 0.11             |
|                       | IL-2 (pg/ml)                                  | 6.0 (3.0)                        | 6.2 (2.6)                       | 0.56             |
|                       | IL-6 (pg/ml)                                  | 4.7 (4.4)                        | 4.7 (4.0)                       | 0.85             |
|                       | IL-10 (pg/ml)                                 | 3.2 (2.8)                        | 3.1 (2.8)                       | 0.48             |
|                       | G-CSF (pg/ml)                                 | 25.6 (5.5)                       | 26.3 (7.3)                      | 0.36             |
|                       | GM-CSF (pg/ml)                                | 73.0 (37.4)                      | 96.7 (60.2)                     | <b>&lt;0.01</b>  |
|                       | MCP-1 (pg/ml)                                 | 132 (19.3)                       | 138 (33.3)                      | 0.11             |
| TNF- $\alpha$ (pg/ml) | 11.2 (9.3)                                    | 12.5 (15.9)                      | 0.41                            |                  |
| Urine                 | IgA ( $\mu$ g/mg creatinine)                  | 3.6 (5.9)                        | 4.3 (19.3)                      | 0.19             |
| Cell counts           | CD4/8 (ratio)                                 | 2.2 (2.5)                        | 2.8 (2.3)                       | 0.35             |
|                       | Leucocytes ( $1 \times 10^9$ /L)              | 6.4 (1.8)                        | 6.9 (2.4)                       | 0.28             |
|                       | Neutrophils ( $1 \times 10^9$ /L)             | 4.2 (1.5)                        | 4.2 (2.1)                       | 0.33             |
|                       | Lymphocytes ( $1 \times 10^9$ /L)             | 1.6 (0.8)                        | 1.6 (0.4)                       | 0.76             |
|                       | Monocytes ( $1 \times 10^9$ /L)               | 0.6 (0.3)                        | 0.6 (0.3)                       | 0.58             |
|                       | Eosinophils ( $1 \times 10^9$ /L)             | 0.2 (0.2)                        | 0.1 (0.1)                       | 0.91             |
|                       | Basophils mean $\pm$ SD ( $1 \times 10^9$ /L) | 0.02 $\pm$ 0.04                  | 0.03 $\pm$ 0.04                 | 0.18             |

|                                                     |                                                                      |             |             |                 |
|-----------------------------------------------------|----------------------------------------------------------------------|-------------|-------------|-----------------|
| Memory cell subsetting                              | Tn<br>%of CD4                                                        | 37.4 (18.8) | 38.5 (26.2) | 0.95            |
|                                                     | Tscm<br>%of CD4                                                      | 8.4 (3.4)   | 9.3 (3.8)   | 0.91            |
|                                                     | Tcm+Ttm<br>%of CD4                                                   | 49.3 (16.1) | 49.9 (24.8) | 0.75            |
|                                                     | Tem<br>%of CD4                                                       | 1.3 (1.4)   | 1.0 (1.4)   | 0.37            |
|                                                     | Tte<br>%of CD4                                                       | 0.2 (1.0)   | 0.3 (0.4)   | 0.72            |
|                                                     | Tn<br>%of CD8                                                        | 16.6 (31.7) | 18.6 (29.1) | 0.31            |
|                                                     | Tscm<br>%of CD8                                                      | 9.9 (8.9)   | 13.0 (9.9)  | 0.11            |
|                                                     | Tcm+Ttm<br>%of CD8                                                   | 32.5 (23.7) | 35.8 (21.0) | 0.41            |
|                                                     | Tem<br>%of CD8                                                       | 6.5 (6)     | 5.2 (3.4)   | 0.07            |
|                                                     | Tte<br>%of CD8                                                       | 14.3 (23.7) | 15.1 (17.6) | 0.75            |
| Senescence markers                                  | Telomere length PBL<br>(Norm. to recent)                             | 1 (1.1)     | 1.2 (1.4)   | 0.63            |
|                                                     | %KLRG positive<br>CD4                                                | 11.6 (19.2) | 13.1 (17.3) | 0.80            |
|                                                     | %KLRG positive<br>CD8                                                | 65.7 (33.0) | 60.1 (30.2) | 0.46            |
| In vitro assays                                     | IgG in supernatant of<br>totally stimulated<br>PBL (ng/ml)           | 1184 (1337) | 1084 (1103) | 0.47            |
|                                                     | IgG in supernatant of<br>PBL stimulated with<br>UTI bacteria (ng/ml) | 236 (472)   | 80.5 (540)  | 0.09            |
|                                                     | %of bacteria specific<br>CD4                                         | 3.3 (3.6)   | 2.8 (2.2)   | 0.25            |
|                                                     | %of bacteria specific<br>CD8                                         | 1.4 (3.6)   | 1.3 (3.0)   | 0.77            |
|                                                     | %of divided CD4<br>cells after PHA<br>stimulation                    | 32.4 (10.2) | 28.0 (12.5) | <b>&lt;0.05</b> |
|                                                     | Number of CD4<br>divisions after PHA<br>stimulation                  | 2.1 (1.0)   | 2.4 (1.3)   | 0.21            |
|                                                     | %of divided CD8<br>cells after PHA<br>stimulation                    | 44.7 (18.4) | 40.4 (13.8) | 0.09            |
| Number of CD8<br>divisions after PHA<br>stimulation | 1.9 (0.9)                                                            | 2.2 (1.1)   | 0.17        |                 |

Median values are shown unless otherwise stated. IQR: inter quartile range, SD: standard deviation, N/A: not applicable, Tn: naïve-, Tscm: central-, Tcm+tm: central and transitional-, Tem: effector-, Tte: terminally differentiated memory T-cell, UTI: urinary tract infections.
